# Supplementary material for: Importance of early treatment decisions on future income of multiple sclerosis patients
Source: PubMed Central journal article supplement (PMC7564625; doi:10.1177/2055217320959116), 2020-10-07

# Kaplan-Meier survival estimates

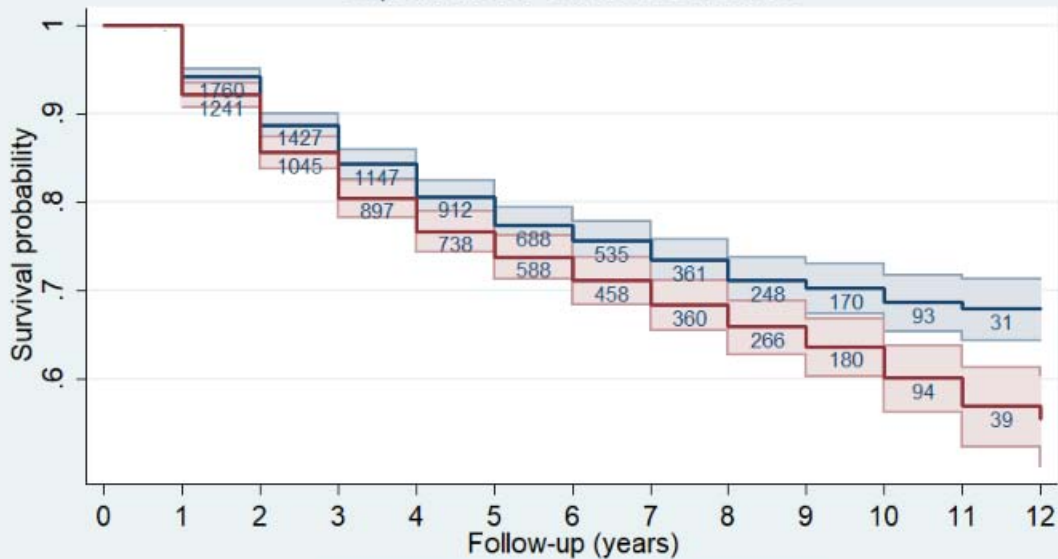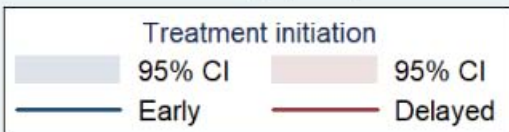

Supplement: sj-pdf-1-mso-10.1177_2055217320959116.pdf [file sj-pdf-1-mso-10.1177_2055217320959116.pdf]
