# Supplementary material for: Importance of early treatment decisions on future income of multiple sclerosis patients
Source: PubMed Central journal article supplement (PMC7564625; doi:10.1177/2055217320959116), 2020-10-07
Supplement: sj-pdf-2-mso-10.1177_2055217320959116.pdf [file sj-pdf-2-mso-10.1177_2055217320959116.pdf]

**Supplementary Table 1. Crude hazard ratios to lose earnings**

| <b>Covariate</b>            | <b>HR</b> | <b>SE</b> | <b>p</b> | <b>95% CI</b> |      |
|-----------------------------|-----------|-----------|----------|---------------|------|
| <b>Time to treatment:</b>   |           |           |          |               |      |
| ≤2 years                    | Ref.      |           |          |               |      |
| >2 years                    | 1.27      | 0.09      | 0.001    | 1.11          | 1.45 |
| <b>Sex:</b>                 |           |           |          |               |      |
| Males                       | Ref.      |           |          |               |      |
| Females                     | 1.03      | 0.08      | 0.68     | 0.89          | 1.20 |
| <b>Age at onset:</b>        |           |           |          |               |      |
| <50 years                   | Ref.      |           |          |               |      |
| ≥50 years                   | 1.97      | 0.24      | <0.001   | 1.55          | 2.51 |
| <b>Education:</b>           |           |           |          |               |      |
| Higher                      | Ref.      |           |          |               |      |
| Secondary                   | 1.93      | 0.15      | <0.001   | 1.65          | 2.26 |
| Lower                       | 3.24      | 0.36      | <0.001   | 2.62          | 4.02 |
| <b>Family situation:</b>    |           |           |          |               |      |
| Married/cohabitant          | Ref.      |           |          |               |      |
| Single                      | 1.27      | 0.09      | <0.001   | 1.11          | 1.45 |
| <b>Country of birth:</b>    |           |           |          |               |      |
| EU and Norway               | Ref.      |           |          |               |      |
| Other                       | 1.70      | 0.22      | <0.001   | 1.32          | 2.21 |
| <b>Type of living area:</b> |           |           |          |               |      |
| Larger cities               | Ref.      |           |          |               |      |
| Medium-sized municipalities | 0.94      | 0.08      | 0.45     | 0.80          | 1.10 |
| Smaller municipalities      | 1.12      | 0.10      | 0.20     | 0.94          | 1.32 |
| <b>Baseline EDSS:</b>       |           |           |          |               |      |
| 0-1.5                       | Ref.      |           |          |               |      |
| 2-4.5                       | 1.76      | 0.13      | <0.001   | 1.52          | 2.04 |
| ≥5                          | 4.82      | 0.53      | <0.001   | 3.88          | 5.98 |

HR – hazard ratio; SE – standard error; CI – confidence intervals; Ref. – reference; EU – the European Union; EDSS – Expanded Disability Status Scale.

**Supplementary Table 2. Clinical and demographic characteristics of the study population in the analysis of benefits**

| Patients' characteristics                  | All patients | Time to treatment |             | p-value   |
|--------------------------------------------|--------------|-------------------|-------------|-----------|
|                                            |              | ≤2 years          | >2 years    |           |
| Number of patients                         | 2975 (100%)  | 1768 (59%)        | 1207 (41%)  | -         |
| Sex:                                       |              |                   |             | 0.9*      |
| Males                                      | 867 (29%)    | 514 (29%)         | 353 (29%)   |           |
| Females                                    | 2108 (71%)   | 1252 (71%)        | 854 (71%)   |           |
| Age at MS onset (mean (SD))                | 31.6 (9.7)   | 32.9 (9.8)        | 29.7 (9.3)  | <0.001**  |
| Age at treatment initiation (mean (SD))    | 36.3 (10.3)  | 33.9 (9.8)        | 40.0 (10.0) | <0.001**  |
| Baseline EDSS (median (IQR))               | 1.5 (1.5)    | 1.5 (2)           | 2 (2)       | <0.001*** |
| Education:                                 |              |                   |             | 0.2*      |
| Higher                                     | 1348 (45%)   | 784 (44%)         | 564 (47%)   |           |
| Secondary                                  | 1356 (46%)   | 830 (47%)         | 526 (43%)   |           |
| Lower                                      | 271 (9%)     | 154 (9%)          | 117 (10%)   |           |
| Family situation:                          |              |                   |             | <0.001*   |
| Married/cohabitant                         | 1536 (52%)   | 777 (44%)         | 759 (63%)   |           |
| Single                                     | 1439 (48%)   | 991 (56%)         | 448 (37%)   |           |
| Country of birth:                          |              |                   |             | 0.9*      |
| EU and Norway                              | 2789 (94%)   | 1657 (94%)        | 1132 (94%)  |           |
| Other                                      | 186 (6%)     | 111 (6%)          | 75 (6%)     |           |
| Type of living area:                       |              |                   |             | 0.5*      |
| Larger cities                              | 1375 (46%)   | 815 (46%)         | 560 (46%)   |           |
| Medium-sized municipalities                | 956 (32%)    | 595 (34%)         | 361 (30%)   |           |
| Smaller municipalities                     | 644 (22%)    | 358 (20%)         | 286 (24%)   |           |
| Number of patients who reached the outcome | 715 (24%)    | 352 (20%)         | 363 (30%)   | <0.001*   |

p-value – for comparisons between two time to treatment groups (≤2 years vs. >2 years). SD – standard deviation. IQR – interquartile range. EDSS – Expanded Disability Status Scale. EU – the European Union.

\* Chi-square test; \*\* one-way ANOVA; \*\*\* Kruskal-Wallis test.

**Supplementary Table 3. Crude hazard ratios to receive benefits**

| <b>Covariate</b>            | <b>HR</b> | <b>SE</b> | <b>p</b> | <b>95% CI</b> |      |
|-----------------------------|-----------|-----------|----------|---------------|------|
| Time to treatment:          |           |           |          |               |      |
| ≤2 years                    | Ref.      |           |          |               |      |
| >2 years                    | 1.42      | 0.11      | <0.001   | 1.23          | 1.65 |
| Sex:                        |           |           |          |               |      |
| Males                       | Ref.      |           |          |               |      |
| Females                     | 1.16      | 0.10      | 0.08     | 0.98          | 1.37 |
| Age at onset:               |           |           |          |               |      |
| <50 years                   | Ref.      |           |          |               |      |
| ≥50 years                   | 1.26      | 0.21      | 0.17     | 0.91          | 1.76 |
| Education:                  |           |           |          |               |      |
| Higher                      | Ref.      |           |          |               |      |
| Secondary                   | 1.32      | 0.11      | 0.001    | 1.13          | 1.55 |
| Lower                       | 1.88      | 0.22      | <0.001   | 1.48          | 2.37 |
| Family situation:           |           |           |          |               |      |
| Married/cohabitant          | Ref.      |           |          |               |      |
| Single                      | 0.92      | 0.07      | 0.28     | 0.80          | 1.07 |
| Country of birth:           |           |           |          |               |      |
| EU and Norway               | Ref.      |           |          |               |      |
| Other                       | 1.42      | 0.20      | 0.009    | 1.09          | 1.88 |
| Type of living area:        |           |           |          |               |      |
| Larger cities               | Ref.      |           |          |               |      |
| Medium-sized municipalities | 1.26      | 0.11      | 0.007    | 1.07          | 1.49 |
| Smaller municipalities      | 1.31      | 0.13      | 0.005    | 1.08          | 1.59 |
| Baseline EDSS:              |           |           |          |               |      |
| 0-1.5                       | Ref.      |           |          |               |      |
| 2-4.5                       | 2.02      | 0.16      | <0.001   | 1.73          | 2.37 |
| ≥5                          | 5.07      | 0.67      | <0.001   | 3.92          | 6.56 |

HR – hazard ratio; SE – standard error; CI – confidence intervals; Ref. – reference; EU – the European Union; EDSS – Expanded Disability Status Scale.
